# Supplementary material for: Dual effects of Ag+ intercalation boosting the kinetics and stability of NH4V4O10 cathodes for enhanced zinc ion storage
Source: Royal Society of Chemistry journal article supplement (doi:10.1039/d4qi01942c), 2024-01-01
Supplement: d4qi01942c1.pdf [file d4qi01942c1.pdf]

## Supplementary Information

### **Dual effects of Ag<sup>+</sup> intercalation boosting kinetics and stability of NH<sub>4</sub>V<sub>4</sub>O<sub>10</sub> cathodes for enhanced zinc ion storage**

Zhou Fang<sup>a</sup>, Yi Tong<sup>a</sup>, Yue Yang<sup>a</sup>, Anjun Hu<sup>b</sup>, Jianping Long<sup>b</sup>, Yan Zhao<sup>a</sup>, Xin Lai<sup>a</sup>,  
Daojiang Gao<sup>a\*</sup>, Mengjiao Liu<sup>a\*</sup>

<sup>a</sup> *College of Chemistry and Materials Science, Sichuan Normal University, Chengdu 610066, P. R.China*

<sup>b</sup> *College of Materials and Chemistry & Chemical Engineering, Chengdu University of Technology, Chengdu 610059, P. R. China*

Corresponding authors: Daojiang Gao and Mengjiao Liu

E-mail address: [daojianggao@sicnu.edu.cn](mailto:daojianggao@sicnu.edu.cn); [liumengjiao@sicnu.edu.cn](mailto:liumengjiao@sicnu.edu.cn)

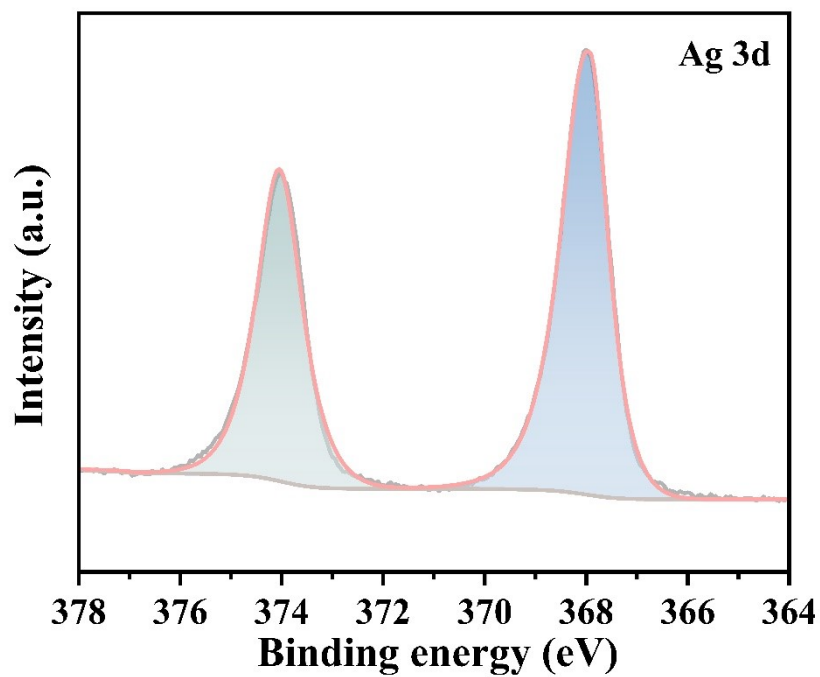

Fig. S1 High-resolution XPS spectra of Ag 3d.

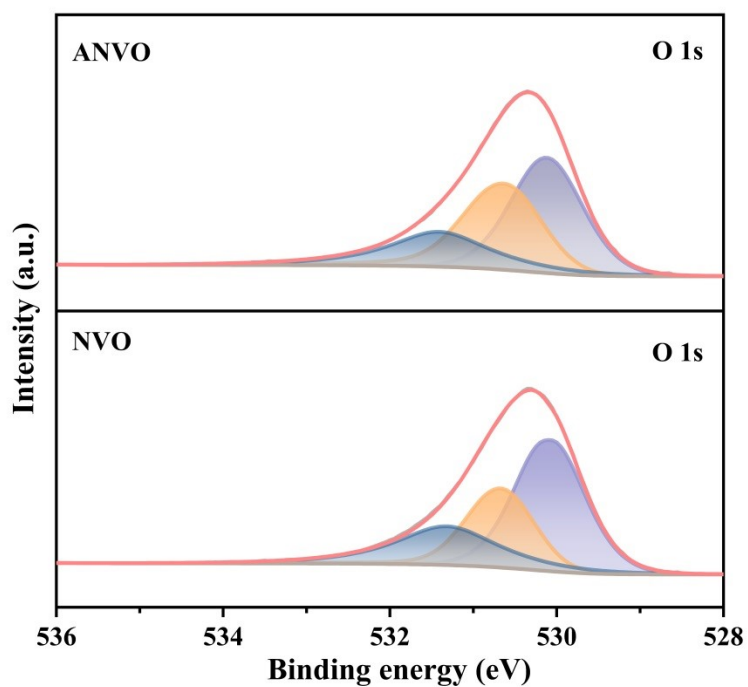

Fig. S2 High-resolution XPS spectra of O 1s.

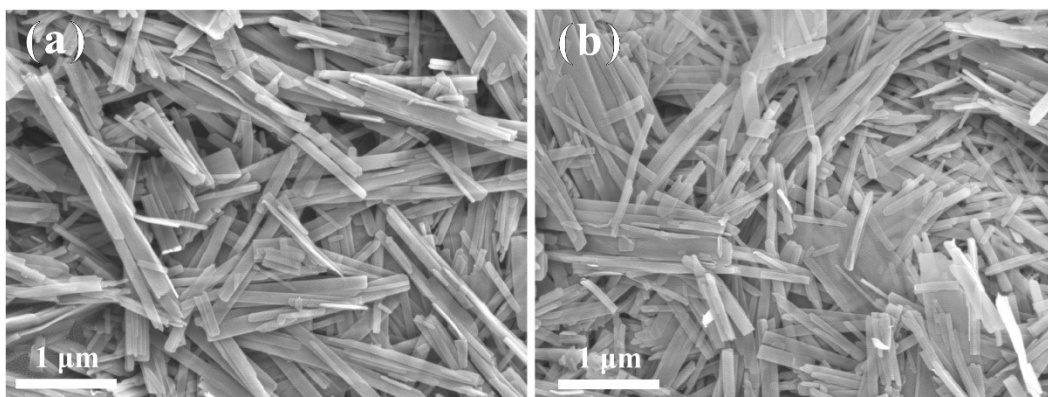

Fig. S3 SEM images of ANVO-1 (a) and ANVO-2 (b).

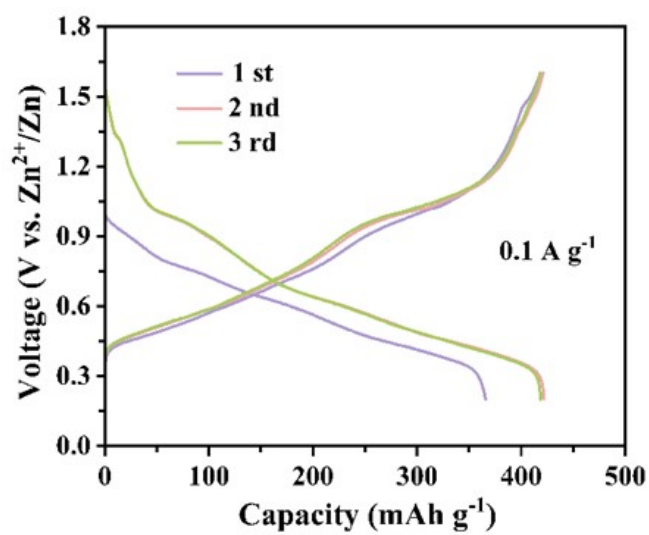

Fig. S4 GCD curves of NVO electrode at  $0.1 \text{ A g}^{-1}$ .

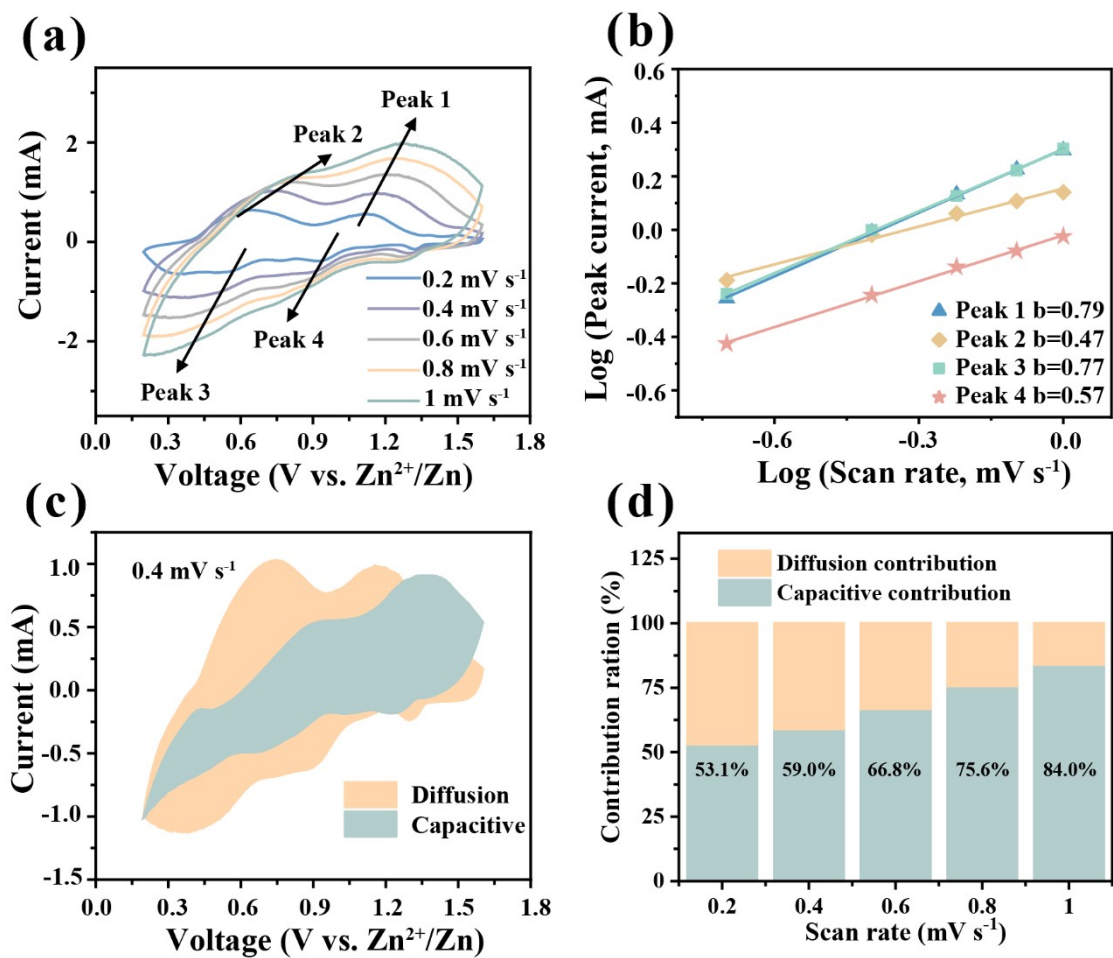

Fig. S5 (a) CV curves of NVO electrode at various scan rates from 0.2 to 1  $\text{mV s}^{-1}$ ; (b) Corresponding  $\text{log}(\text{peak current})$  vs  $\text{log}(\text{scan rate})$  plots of peaks; (c) Capacitive-diffusion contribution ratio at 0.4  $\text{mV s}^{-1}$ ; (d) Capacitive-diffusion contribution ratio at various scan rate.

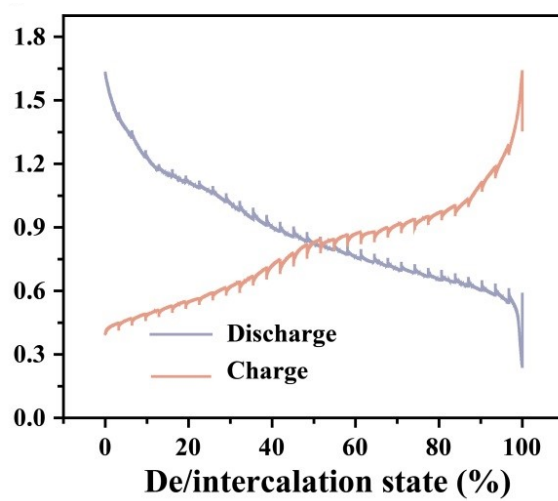

Fig. S6 GITT curve of NVO electrode.

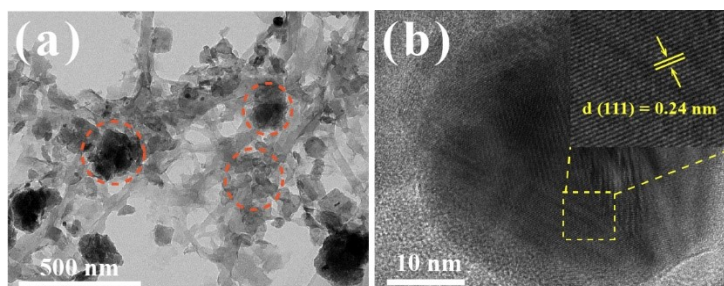

Fig. S7 (a) TEM image of ANVO electrode at the fully discharged state; (b) HRTEM images of Ag<sup>0</sup>.

Table S1. A comparison of the electrochemical performance in this work with those of the recently reported vanadium oxides-based cathodes for aqueous zinc-ion batteries.

| Cathodes                                                                               | Testing Voltage (V) | Rate specific capacity (mAh/g)  | Cycle performance (mAh/g)           | Ref.      |
|----------------------------------------------------------------------------------------|---------------------|---------------------------------|-------------------------------------|-----------|
| ANVO                                                                                   | 0.2–1.6             | 473.6(0.2 A/g)<br>286.6(10 A/g) | 343.1<br>(5A/g after 1000 cycles)   | this work |
| $\text{Na}_{0.3}(\text{NH}_4)_{0.6}\text{V}_4\text{O}_{10}\cdot 0.4\text{H}_2\text{O}$ | 0.4–1.5             | 258(5 A/g)                      | 211<br>(10 A/g after 2000 cycles)   | S1        |
| AP-NVO                                                                                 | 0.3–1.5             | 447(0.2 A/g)<br>263(5 A/g)      | 217<br>(5 A/g after 2000 cycles)    | S2        |
| Al-NVO@CC                                                                              | 0.2–1.6             | 275.4(0.5 A/g)<br>155.5(5 A/g)  | 152.8<br>(5 A/g after 2500 cycles)  | S3        |
| $\text{MnV}_2\text{O}_4(\text{p})/\text{C}-700$                                        | 0.2–1.8             | 410(0.1 A/g),<br>184(5 A/g)     | 150<br>(20 A/g after 1000 cycles)   | S4        |
| P-NVO                                                                                  | 0.4–1.6             | 397.5(0.1 A/g)                  | 300<br>(10 A/g after 1000 cycles)   | S5        |
| $\text{NH}_4\text{V}_4\text{O}_{10-x}@r\text{GO}$                                      | 0.2–1.6             | 278(10 A/g)                     | 191<br>(15 A/g after 2000 cycles)   | S6        |
| SNVO                                                                                   | 0.4–1.5             | 283.4(10 A/g)                   | 287.9<br>(10 A/g after 1000 cycles) | S7        |

## References

- S1 X. Wang, A. Naveed, T. Zeng, T. Wan, H. Zhang, Y. Zhou, A. Dou, M. Su, Y. Liu and D. Chu, Sodium ion stabilized ammonium vanadate as a high-performance aqueous zinc-ion battery cathode, *Chem. Eng. J.*, 2022, **446**, 137090.
- S2 W. Kang, B. Zhang, Z. Wang, Z. Zhang, M. Niu, X. An, Z. Mou, X. Fan, X. Hu, B. Xi and S. Xiong, Synchronous organic-inorganic co-intercalated ammonium vanadate cathode for advanced aqueous zinc-ion batteries, *J. Energy Chem.*, 2024, **94**, 608-617.
- S3 K. Wang, R. Yuan, M. Li, Y. Huang, W. Ai, Z. Du, P. He and B. Wang, Al<sup>3+</sup> intercalated NH<sub>4</sub>V<sub>4</sub>O<sub>10</sub> nanosheet on carbon cloth for high-performance aqueous zinc-ion batteries, *Chem. Eng. J.*, 2023, **471**, 144655.
- S4 W. Leng, L. Cui, Y. Liu and Y. Gong, MOF-Derived MnV<sub>2</sub>O<sub>4</sub>/C Microparticles with Graphene Coating Anchored on Graphite Sheets: Oxygen Defect Engaged High Performance Aqueous Zinc-Ion Battery, *Advanced Materials Interfaces*, 2022, **9**, 2101705.
- S5 Y. Li, Y. Liu, J. Chen, Q. Zheng, Y. Huo, F. Xie and D. Lin, Polyaniline intercalation induced great enhancement of electrochemical properties in ammonium vanadate nanosheets as an advanced cathode for high-performance aqueous zinc-ion batteries, *Chem. Eng. J.*, 2022, **448**, 137681.
- S6 F. Cui, D. Wang, F. Hu, X. Yu, C. Guan, G. Song, F. Xu and K. Zhu, Deficiency and surface engineering boosting electronic and ionic kinetics in NH<sub>4</sub>V<sub>4</sub>O<sub>10</sub> for high-performance aqueous zinc-ion battery, *Energy Storage Mater.*, 2022, **44**, 197-205.

S7 S. Yao and Y. Sun, Defect engineering and morphology adjustment assist  $\text{NH}_4\text{V}_4\text{O}_{10}$  to be a high-performance aqueous zinc ion battery cathode, *J. Mater. Chem. A*, 2024, **12**, 17213-17221.
